# Supplementary material
Source: PubMed Central journal article supplement (PMC6494082)
Supplement: NIHMS1016490-supplement-1.pdf [file NIHMS1016490-supplement-1.pdf]

Supplemental table 1. Descriptive characteristics of prostate cancer quality measures

| Measures                                                                                                                               | Proposed by |
|----------------------------------------------------------------------------------------------------------------------------------------|-------------|
| <b>Structure</b>                                                                                                                       |             |
| The proportion of patients treated by a high volume (upper tertile) provider (surgeon or radiation oncologist)                         | RAND        |
| Availability of radiation oncology facilities and psychological counselling for patients                                               | RAND        |
| Broad certification of urologists and radiation oncologists                                                                            | RAND        |
| Information about outcomes for patients treated by an institution                                                                      | RAND        |
| Evidence of institutional adherence to practice protocol for the college of American Pathologists for management of pathology specimen | RAND        |
| <b>Process</b>                                                                                                                         |             |
| DRE (Digital Rectal Examination)                                                                                                       | RAND        |
| At least 10 core-needle samples taken at time of prostate biopsy                                                                       | ERSPC       |
| PSA (Prostate Specific Antigen) level documented                                                                                       | RAND        |
| Clinical T stage documented                                                                                                            | PQRI        |
| Assessing the stage of the disease before the treatment/pre-treatment clinical staging with DRE, total PSA, Gleason Grade              | RAND        |
| Assessment of the family history of prostate cancer                                                                                    | RAND        |
| Comorbidity assessment                                                                                                                 | RAND        |
| Bone scan done in high-risk patients                                                                                                   | NCCN        |
| CT Scan done in high-risk patients                                                                                                     | NCCN        |
| Avoidance of Overuse Measure- Bone scan for Staging Low-Risk Patients                                                                  | AMA         |
| Avoidance of Overuse Measure- CT scan for Staging Low-Risk Patients                                                                    | PCP         |
| A clear description of the risk of treatment complications                                                                             | RAND        |
| Gleason score reported to patient                                                                                                      | RAND        |
| Patient's assessment of urinary, sexual, and bowel functioning before treatment                                                        | RAND        |
| Percentage of high risk patients receiving lymphadenectomy                                                                             | AQUA        |
| Measuring the amount of blood loss during a radical prostatectomy                                                                      | RAND        |
| Appropriate antibiotic use and discontinuation                                                                                         | AQUA        |

|                                                                                                                            |      |
|----------------------------------------------------------------------------------------------------------------------------|------|
| Appropriate thromboprophylaxis rates                                                                                       | AQUA |
| Use of adjuvant ADT before brachytherapy                                                                                   | AQUA |
| DEXA Scan for men starting $\geq$ 12 months of ADT                                                                         | AQUA |
| Document cholesterol and /or glucose levels before starting ADT $\geq$ 12 months and again with 12 months after starting   | AQUA |
| Percent use of active surveillance for very low-risk patients                                                              | AQUA |
| Document $\geq$ 2 PSAx within one year following treatment or initiation of active surveillance                            | AQUA |
| Number of chemotherapy cycles documented                                                                                   | QOPI |
| Treatment Summary communication                                                                                            | AMA  |
| Effectiveness of narcotic assessed on visit following prescription                                                         | QOPI |
| Chemotherapy intent (curative vs palliative documented before or within two weeks after administration)                    | QOPI |
| Chemotherapy intent discussion with patient documented                                                                     | QOPI |
| Use of white cell stimulating factors when the risk of febrile neutropenia for patients is less than 20%                   | QOPI |
| Signed patient consent for chemotherapy                                                                                    | QOPI |
| Patient consent documentation in practitioner note                                                                         | QOPI |
| Chemotherapy treatment summary completed within 3 months of chemotherapy end                                               | QOPI |
| Chemotherapy treatment provided to patient within 3 months of chemotherapy end                                             | QOPI |
| Chemotherapy treatment summary provided or communicated to practitioner(s) within 3 months of chemotherapy end             | QOPI |
| Cigarette smoking status documented by second office visit ( Smoking status/tobacco use documented in past year from QOPI) | QOPI |
| Smoking cessation counselling recommended to cigarette smokers by 2nd office visit                                         | QOPI |
| Action taken to address problems with emotional well-being by the second office visit                                      | QOPI |
| Rate of acute surgical complications                                                                                       | RAND |
| Using computerized tomography to plan treatment for radiation therapy                                                      | RAND |
| Immobilizing the patient during treatment while protecting rectal mucosa                                                   | RAND |
| Radical Prostatectomy Pathology Reporting                                                                                  | CAP  |

|                                                                                                     |                                                            |
|-----------------------------------------------------------------------------------------------------|------------------------------------------------------------|
| Androgen deprivation therapy (ADT)/adjuvant hormonal therapy for High Risk Prostate Cancer Patients | AMA                                                        |
| Docetaxel-based chemotherapy for castration-resistant, metastatic prostate cancer                   | Trials (SWOG-99-16 <sup>1</sup> and TAX-327 <sup>2</sup> ) |
| Received radiation therapy (RT) within 30 days of death                                             | ASTRO                                                      |
| Conformal radiation utilized for patients receiving XRT                                             | AQUA                                                       |
| Following with the patient at least twice during the first year treatment                           | RAND                                                       |
| Surgery performed under epidural anesthesia after retro pubic prostatectomy                         | N/A                                                        |
| Received chemotherapy in the last 14 days of life                                                   | RAND                                                       |
| 3-D CRT or IMRT for prostate cancer patients treated with EBRT                                      | D'Amico et al. 1998 <sup>3</sup>                           |
| Use of high energy photon (> 10 mV) Photons                                                         | D'Amico et al. 1998 <sup>3</sup>                           |
| Central axis doses of at least 75 Gy for radiotherapy                                               | D'Amico et al. 1998 <sup>3</sup>                           |
| Prescription of narcotic pain medication for advanced cancer patients in pain                       | N/A                                                        |
| Communicating with the patient's primary care physician to ensure continuing care                   | RAND                                                       |
| Plan of care for moderate/severe pain documented                                                    | QOPI                                                       |
| Pain assessed by second office visit                                                                | QOPI                                                       |
| Constipation assessed at time of narcotic prescription or following visit                           | QOPI                                                       |
| Patient emotional well-being assessed by the second office visit                                    | QOPI                                                       |
| PSA monitoring after treatment                                                                      | ASCO, AQUA                                                 |
| DRE monitoring in active surveillance                                                               | AQUA                                                       |
| Repeat biopsy in 18 months in active surveillance                                                   | AQUA                                                       |
| Use of active surveillance, watchful waiting for low-risk prostate cancer                           | AQUA                                                       |
| <b>Outcome</b>                                                                                      |                                                            |
| Hospitalization or medical or surgical treatment for a variety of serious complications             | RAND                                                       |

|                                                                                |      |
|--------------------------------------------------------------------------------|------|
| Avoided multiple hospital admissions in last 30 days of life                   | ASCO |
| Hospice Admissions for Cancer in the Final Days of Life                        | ASCO |
| T-stage stratified surgical margin status                                      | AQUA |
| Patient's assessment of urinary, sexual, and bowel functioning after treatment | RAND |
| Patients' satisfaction with treatment choice, continence, and potency          | RAND |

Bibliography to Supplemental table 1:

1. Petrylak DP, Ankerst DP, Jiang CS, Tangen CM et al. Evaluation of prostate-specific antigen declines for surrogacy in patients treated on SWOG 99-16. *J Natl Cancer Inst.* 2006 Apr 19;98(8):516-21.
2. Tannock IF, de Wit R, Berry WR, Horti J et al. Docetaxel plus prednisone or mitoxantrone plus prednisone for advanced prostate cancer. *N Engl J Med.* 2004 Oct 7;351(15):1502-12.
3. D'Amico AV, Whittington R, Malkowicz SB, Schultz D et al. Biochemical outcome after radical prostatectomy, external beam radiation therapy, or interstitial radiation therapy for clinically localized prostate cancer. (1998) *JAMA* 280: 969–974

RAND, RAND Corporation; DRE, digital rectal examination; ERSPC, European Randomized Study of Screening for Prostate Cancer; PSA, prostate-specific antigen; PQRI, Physician Quality Reporting Initiative; NCCN, National Comprehensive Cancer Network; CT, computed tomography; AMA, American Medical Association; PCPI, Physician Consortium for Performance Improvement (AMA-convened PCPI); AQUA, American Urology Association Quality Registry; DEXA, dual-energy x-ray absorptiometry; QOPI, Quality Ontology Initiative; CAP, College of American Pathologists; SWOG, (formerly Southwest Oncology Group); TAX 327, docetaxel study investigators; N/A, not applicable; 3D-CRT, three-dimensional conformal radiation therapy; IMRT, intensity modulated radiation therapy; EBRT, external beam radiation therapy; ASCO, American Society of Clinical Oncology.
